# Supplementary material
Source: HighWire-hosted journal article supplement (https://www.life-science-alliance.org/content/4/8/e202101079/F7)
Supplement: inline-supplementary-material-7 [file inline-supplementary-material-7.pdf]

Raw mRNA values in control, edem1Ri and edem1Ri; rheb larvae

| <i>eiger</i> | <i>pplG4&gt;w<sup>1118</sup></i> | <i>pplG4&gt;edem1Ri</i> | <i>pplG4&gt;edem1Ri; rheb</i> |
|--------------|----------------------------------|-------------------------|-------------------------------|
| Set 1        | 0.6685363217269                  | 1.5350889895381         | 0.674533674537069             |
| Set 2        | 1.1601949151571                  | 1.7991308938828         | 0.663665592420206             |
| Set 3        | 0.8723255080713                  | 1.8325901115411         | 0.61360654712138              |
| Set 4        | 1.2747374113275                  | 1.9621605006669         | 0.662185604471392             |
| Set 5        | 1.0242058437170                  | 1.7000169418515         | 0.737696794574762             |
|              |                                  |                         |                               |
| <i>nlaz</i>  |                                  |                         |                               |
| Set 1        | 0.84928                          | 2.38839                 | 0.95574                       |
| Set 2        | 1.10714                          | 4.70725                 | 1.28451133868618              |
| Set 3        | 0.54495                          | 1.94082                 | 1.51494019350685              |
| Set 4        | 0.71908                          | 1.10799                 | 1.72129                       |
| Set 5        | 1.49409                          | 1.37453                 | 0.46207                       |
| Set 6        | 0.9899                           | 2.52111                 | 1.72129                       |
| Set 7        | 1.93214                          | 2.99269                 | 1.01027569851267              |
| Set 8        | 0.36342                          | 2.32873                 | 1.03681796295829              |

Raw mRNA values in control, edem1Ri and edem1Ri; rheb larvae

| <i>4ebp</i> | <i>pplG4&gt;w<sup>1118</sup></i> | <i>pplG4&gt;edem1Ri</i> | <i>pplG4&gt;edem1Ri; rheb</i> |
|-------------|----------------------------------|-------------------------|-------------------------------|
| Set 1       | 0.92614                          | 1.28353                 | 1.33914255136512              |
| Set 2       | 1.13786                          | 1.53112                 | 1.15699719039187              |
| Set 3       | 2.77893                          | 3.32745                 | 1.19582389160701              |
| Set 4       | 0.8385                           | 0.84619                 | 0.739889319519637             |
| Set 5       | 1.27974                          | 1.10745                 | 0.62412                       |
| Set 6       | 0.545                            | 1.28983                 | 1.25592                       |
| Set 7       | 0.53498                          | 0.81379                 | 1.161                         |
| Set 8       | 1.08717                          | 1.47197                 | 1.20848                       |
| Set 9       | 0.18492                          | 1.44662                 | 0.94002                       |
| Set 10      | 1.16595                          | 1.28353                 | 1.17096                       |
| Set 11      | 0.97712                          | 1.32472                 | 0.682                         |
| Set 12      | 0.54369                          | 1.28353                 | 1.07425                       |
|             |                                  |                         |                               |
|             |                                  |                         |                               |
| <i>inr</i>  |                                  |                         |                               |
| Set 1       | 2.65438                          | 2.81779                 | 1.9129983382125               |
| Set 2       | 0.00436                          | 0.36806                 | 0.0809763501118359            |
| Set 3       | 0.71256                          | 0.62127                 | 0.60641                       |
| Set 4       | 0.49296                          | 1.36781                 | 1.08693                       |
| Set 5       | 0.52536                          | 0.82118                 | 1.18911                       |
| Set 6       | 1.41598                          | 1.98517                 | 1.03910591552906              |
| Set 7       | 1.3423922372969                  | 5.3084290875260         | 1.14241869510128              |
| Set 8       | 0.9286737387322                  | 2.5768196308809         | 2.04766907349916              |
| Set 9       | 0.9897266459239                  | 3.739846535353          | 2.24015366197306              |
| Set 10      | 0.9591621497475                  | 3.1582950405364         | 2.14342768349719              |
| Set 11      | 0.9744443978357                  | 3.4488316631524         | 2.1912526419525               |

Raw mRNA values in control, edem1Ri and edem1Ri; rheb larvae

| <i>dilp3</i> | <i>pplG4&gt;w<sup>1118</sup></i> | <i>pplG4&gt;edem1Ri</i> | <i>pplG4&gt;edem1Ri;<br/>rheb</i> |
|--------------|----------------------------------|-------------------------|-----------------------------------|
| Set 1        | 1.06786                          | 0.8949                  | 1.06896                           |
| Set 2        | 1.07475                          | 0.93537                 | 0.56474                           |
| Set 3        | 0.57242                          | 0.63936                 | 0.98201                           |
| Set 4        | 1.35958                          | 0.8935                  | 1.15538                           |
| Set 5        | 1.27695                          | 0.67944                 | 0.80868                           |
| Set 6        | 0.86492                          | 0.80346                 | 0.98159                           |
| Set 7        | 1.61878                          | 0.46656                 | 0.89492                           |
| Set 8        | 0.8949                           | 0.14571                 | 0.6469                            |
| Set 9        | 0.99516                          | 0.8949                  | 0.31157                           |
| Set 10       | 0.88711                          | 1.00371                 | 0.67425                           |
| Set 11       | 0.70289                          | 0.88811                 | 0.61957                           |
| Set 12       | 1.02129                          | 0.40338                 | 0.72894                           |
| Set 13       | 0.85776                          | 0.29435                 | 0.5102                            |
| Set 14       | 0.80563                          | 0.09193                 | 0.61929                           |

Raw triglyceride/protein ratio of 5-day old adult control, edem1Ri, rheb and edem1Ri; rheb males

|       | <i>pplG4&gt;w<sup>1118</sup></i> | <i>pplG4&gt;edem1Ri</i> | <i>pplG4&gt;rheb</i> | <i>ppl&gt;edem1Ri; rheb</i> |
|-------|----------------------------------|-------------------------|----------------------|-----------------------------|
| Set 1 | 98.164443679515                  |                         | 111.535817689171     | 101.939270267911            |
| Set 2 | 98.941286946308                  | 137.73748852885         | 176.659527902722     | 108.616625832804            |
| Set 3 | 102.89426937417                  | 161.83163917326         | 170.423097536669     | 105.441442834329            |

Percentage values of flies surviving after starvation of 5-day old adult control, edem1Ri, rheb and edem1Ri; rheb males

|    | <i>pplG4&gt;w<sup>1118</sup></i> | <i>pplG4&gt;edem1Ri</i> | <i>pplG4&gt;rheb</i> | <i>pplG4&gt;edemRi; rheb</i> |
|----|----------------------------------|-------------------------|----------------------|------------------------------|
| 0  | 100                              | 100                     | 100                  | 100                          |
| 2  | 100                              | 100                     | 100                  | 100                          |
| 4  | 100                              | 100                     | 100                  | 100                          |
| 6  | 100                              | 100                     | 100                  | 100                          |
| 8  | 100                              | 100                     | 100                  | 100                          |
| 10 | 100                              | 100                     | 100                  | 100                          |
| 12 | 100                              | 100                     | 100                  | 100                          |
| 14 | 100                              | 100                     | 100                  | 100                          |
| 16 | 100                              | 100                     | 100                  | 100                          |
| 18 | 100                              | 100                     | 100                  | 100                          |
| 20 | 100                              | 100                     | 100                  | 100                          |
| 22 | 100                              | 100                     | 100                  | 100                          |
| 24 | 97.029702970297                  | 100                     | 100                  | 97.6190476190476             |
| 26 | 96.039603960396                  | 100                     | 100                  | 96.031746031746              |
| 28 | 96.039603960396                  | 100                     | 98.305084745762      | 96.031746031746              |
| 30 | 96.039603960396                  | 99.090909090909         | 98.305084745762      | 96.031746031746              |
| 32 | 94.059405940594                  | 99.090909090909         | 98.305084745762      | 92.8571428571429             |
| 34 | 92.079207920792                  | 97.272727272727         | 98.305084745762      | 90.4761904761905             |
| 36 | 91.089108910891                  | 95.454545454545         | 94.915254237288      | 86.5079365079365             |
| 38 | 87.128712871287                  | 94.545454545454         | 93.220338983050      | 84.9206349206349             |
| 40 | 79.207920792079                  | 92.727272727272         | 91.525423728813      | 80.952380952381              |
| 42 | 76.237623762376                  | 87.272727272727         | 88.135593220339      | 77.7777777777778             |
| 44 | 62.376237623762                  | 80                      | 84.745762711864      | 61.9047619047619             |
| 46 | 47.524752475247                  | 78.181818181818         | 77.966101694915      | 50                           |
| 48 | 34.653465346534                  | 69.090909090909         | 74.576271186440      | 34.1269841269841             |
| 50 | 30.693069306930                  | 50.909090909090         | 69.491525423728      | 23.8095238095238             |
| 52 | 14.851485148514                  | 41.818181818181         | 55.932203389830      | 15.8730158730159             |
| 54 | 3.960396039603                   | 29.090909090909         | 54.237288135593      | 6.34920634920635             |
| 56 | 0.990099009900                   | 22.727272727272         | 40.677966101694      | 0                            |
| 58 | 0                                | 18.181818181818         | 30.508474576271      |                              |
| 60 |                                  | 13.636363636363         | 27.118644067796      |                              |
| 62 |                                  | 11.818181818181         | 20.338983050847      |                              |
| 64 |                                  | 10.909090909090         | 18.644067796610      |                              |
| 66 |                                  | 10                      | 15.254237288135      |                              |
| 68 |                                  | 7.272727272727          | 8.4745762711864      |                              |
| 70 |                                  | 2.727272727272          | 6.7796610169491      |                              |
| 72 |                                  | 0                       | 5.0847457627118      |                              |
| 74 |                                  |                         | 1.6949152542372      |                              |
| 76 |                                  |                         | 0                    |                              |
